# Supplementary material for: The efficacy of suppressive antibiotic treatment in patients managed non-operatively for periprosthetic joint infection and a draining sinus
Source: Copernicus journal article supplement (doi:10.5194/jbji-6-313-2021), 2021-08-17
Supplement: Supplementary file [file jbji-6-313-2021-supplement.pdf]

Supplement of J. Bone Joint Infect., 6, 313–319, 2021  
<https://doi.org/10.5194/jbji-6-313-2021-supplement>  
© Author(s) 2021. CC BY 4.0 License.

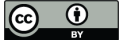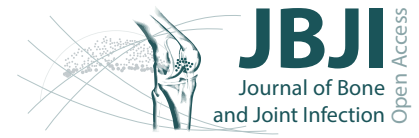

*Supplement of*

## **The efficacy of suppressive antibiotic treatment in patients managed non-operatively for periprosthetic joint infection and a draining sinus**

**Karel-Jan Dag François Lensen et al.**

*Correspondence to:* Marjan Wouthuyzen-Bakker (m.wouthuyzen-bakker@umcg.nl)

The copyright of individual parts of the supplement might differ from the article licence.

| Antibiotic                   | First SAT     | Second SAT    | Third SAT    |
|------------------------------|---------------|---------------|--------------|
| Sulfamethoxazol-trimethoprim | 16/63 (25.4%) | 16/38 (42.1%) | 4/18 (22.2%) |
| Amoxicillin                  | 5/63 (7.9%)   | 0/38 (0%)     | 0/18 (0%)    |
| Amoxicillin-clavulanic acid  | 3/63 (4.7%)   | 3/38 (7.9%)   | 1/18 (5.6%)  |
| Ciprofloxacin                | 7/63 (11.1%)  | 3/38 (7.9%)   | 0/18 (0%)    |
| Levofloxacin                 | 4/63 (6.3%)   | 0/38 (0%)     | 1/18 (5.6%)  |
| Doxycyclin                   | 6/63 (9.5%)   | 0/38 (0%)     | 2/18 (11.1%) |
| Clindamycin                  | 4/63 (6.3%)   | 4/38 (10.5%)  | 2/18 (11.1%) |
| Minocyclin                   | 4/63 (6.3%)   | 1/38 (2.6%)   | 0/18 (0%)    |
| Cefadrox                     | 2/63 (3.2%)   | 1/38 (2.6%)   | 1/18 (5.6%)  |
| Other*                       | 12/63 (19.3%) | 10/38 (16.3%) | 7/18 (38.9%) |

**Supplemental Table 1.** The prescription of suppressive antibiotic treatment (SAT). The Table indicates different regimens used per individual (First, second and third period).

| Adverse event     | First SAT     | Second SAT   | Third SAT    |
|-------------------|---------------|--------------|--------------|
| Total number      | 17/63 (27.0%) | 8/37 (21.6%) | 4/18 (22.2%) |
| Specified         |               |              |              |
| Gastro-intestinal | 10/63 (15.9%) | 1/37 (2.6%)  | 1/18 (5.6%)  |
| Hematological     | 2/63 (3.2%)   | 2/37 (5.3%)  | 2/18 (11.1%) |
| Musculoskeletal   | 2/63 (3.2%)   | 0/37 (0%)    | 0/18 (0%)    |
| Dermatological    | 2/63 (3.2%)   | 0/37 (0%)    | 0/18 (0%)    |
| Allergy           | 0/63 (0%)     | 4/37 (10.5%) | 0/18 (0%)    |
| Other             | 1/63 (1.6%)   | 1/37 (2.6%)  | 1/18 (5.6%)  |

**Supplemental Table 2.** Adverse events in PJI patients with a draining sinus on suppressive antibiotic treatment (SAT). The Table indicates different regimens used per individual (First, second and third period).
